# Supplementary material
Source: PubMed Central journal article supplement (PMC9560999)
Supplement: NIHMS1829062-supplement-1.pdf [file NIHMS1829062-supplement-1.pdf]

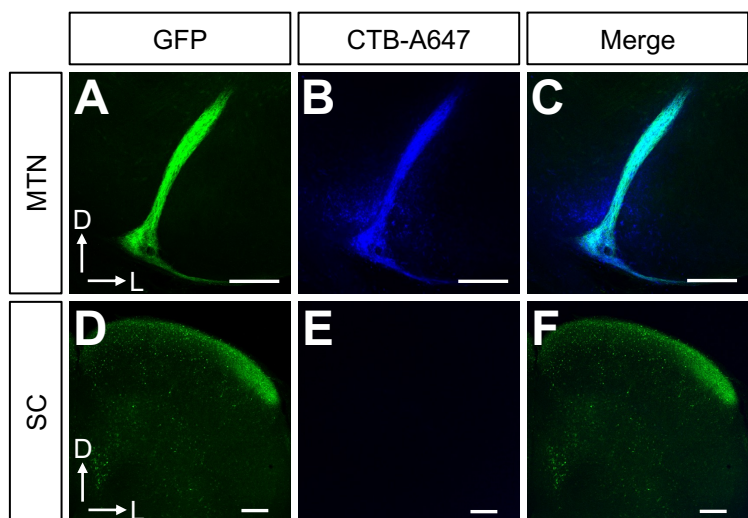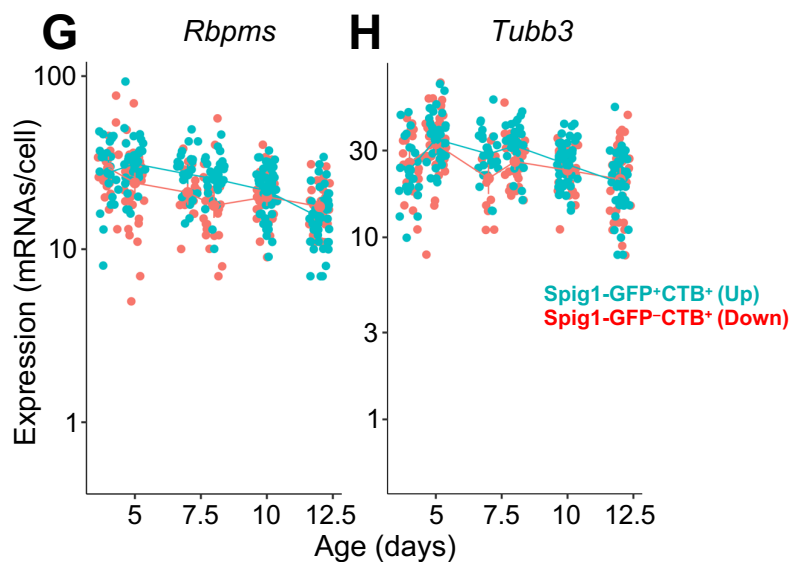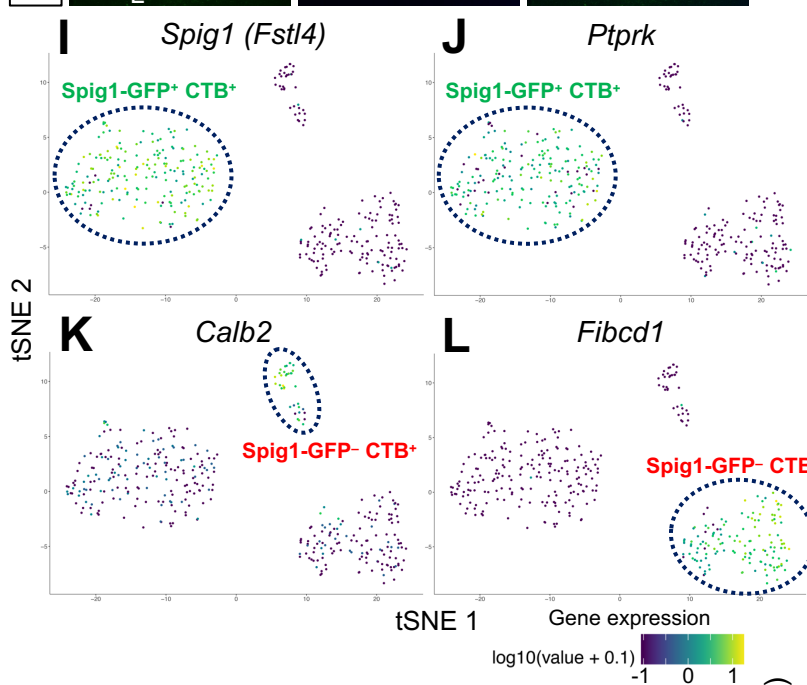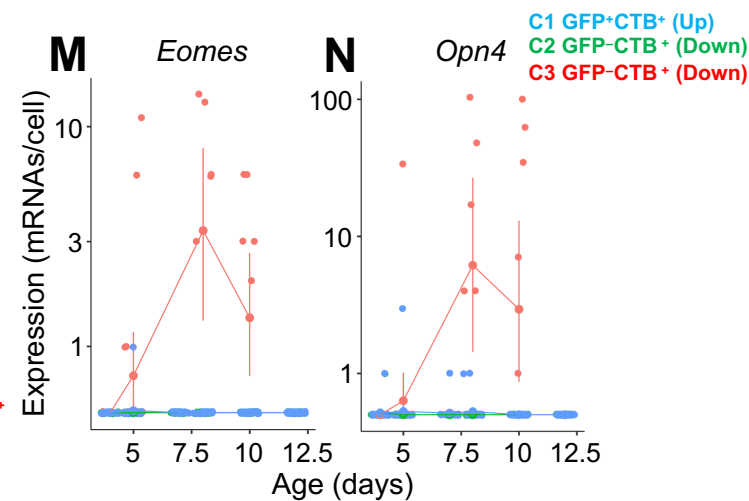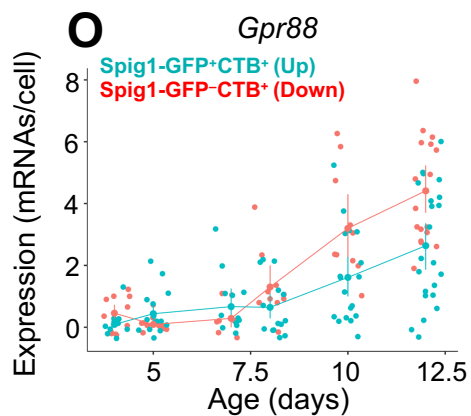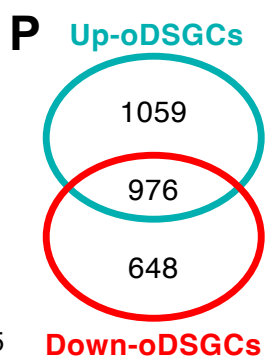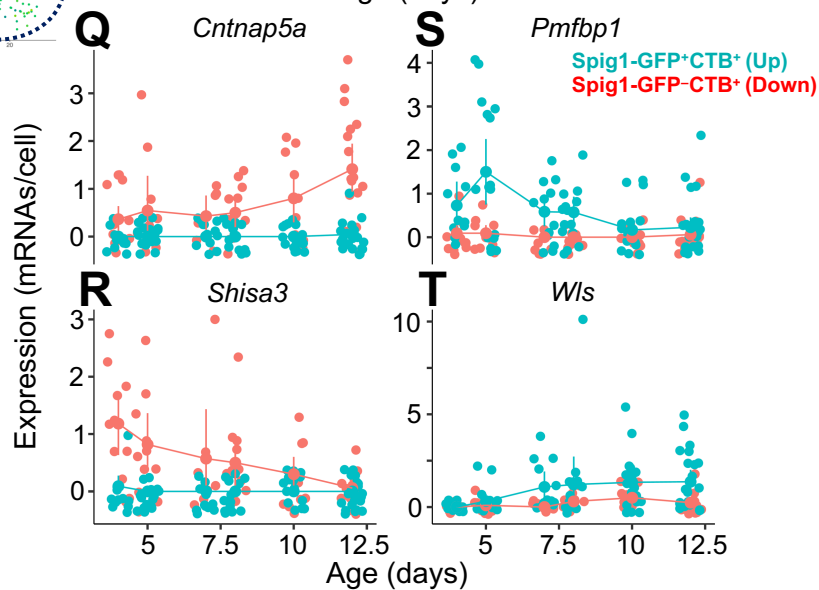

**Figure S1. Additional transcriptomic characterization of up- and down-oDSGCs, related to Figure 1.**

**(A-F)** Coronal brain slices from P8 *Spig1-GFP* mice following CTB-A647 injection into the MTN at P3. After stereotactic injection of CTB-A647 into the MTN, brains from *Spig1-GFP* mice were examined to confirm the presence of CTB-A647 in the MTN (A-C) and the absence of CTB-A647 in other retinorecipient brain regions like the superior colliculus (SC) (D-F). **(G-H)** Single-cell RNAseq gene expression jitter plots show that both up-oDSGCs (*Spig1-GFP*<sup>+</sup>CTB<sup>+</sup>) and down-oDSGCs (*Spig1-GFP*<sup>-</sup>CTB<sup>+</sup>) express the RGC marker *Rbpms* (G) and the neuron marker *Tubb3* (H). Data presented as mean  $\pm$  95% confidence intervals. **(I-L)** tSNE plots show marker genes for the 3 populations of MTN-projecting DSGCs. *Spig1-GFP*<sup>+</sup> up-oDSGCs uniquely expressed *Spig1* (I) and *Ptprk* (J), the smaller cluster of *Spig1-GFP*<sup>-</sup> cells expressed *Calb2* (K), and the larger cluster of *Spig1-GFP*<sup>-</sup> cells expressed *Fibcd1* (L). **(M-N)** Single-cell RNAseq gene expression jitter plots showing the expression of *Eomes* (M) and *Opn4* (N), both markers of ipRGCs, in the small cluster of GFP<sup>-</sup>CTB<sup>+</sup> RGCs. Data presented as mean  $\pm$  95% confidence intervals. **(O)** In our single-cell RNAseq data, both up-oDSGCs and down-oDSGCs expressed *Gpr88*, a marker of up- and down-oDSGCs seen in the 10X Genomics single-cell RNAseq data from Tran and colleagues (2019). Data presented as mean  $\pm$  95% confidence intervals. **(P)** Venn diagram showing the number of genes that change between P4 and P12 in up- and down-oDSGCs. **(Q-T)** Exemplar genes that change linearly across time in down-oDSGCs (Q-R) and up-oDSGCs (S-T). Data presented as mean  $\pm$  95% confidence intervals. D, dorsal. L, lateral. Scale bars, 250  $\mu$ m.

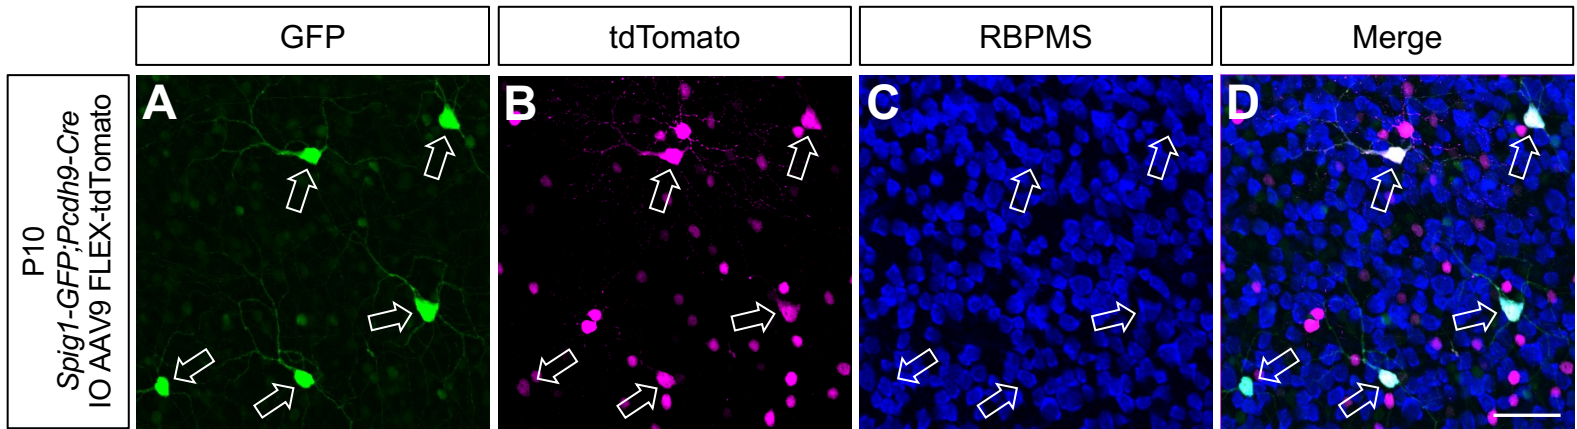

**E**

$$\frac{\text{GFP}^+ \text{tdTomato}^+ \text{RBPMS}^+}{\text{tdTomato}^+ \text{RBPMS}^+} = \frac{74}{75} = 99\%$$

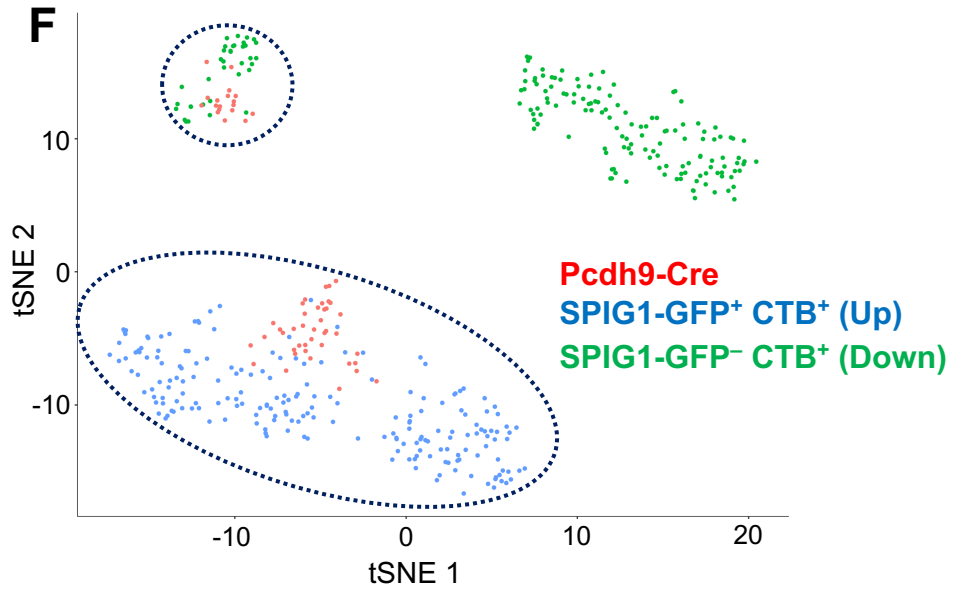

**Figure S2. *Pcdh9-Cre* and *Spig1-GFP* both label up-oDSGCs, related to Figure 2.**

**(A-D)** Whole-mount P10 *Pcdh9-Cre/+;Spig1-GFP/+* retina following an intraocular injection with AAV9 FLEX-tdTomato at P2 shows GFP<sup>+</sup>tdTomato<sup>+</sup>RBPMS<sup>+</sup> RGCs (arrows). **(E)** Among all tdTomato<sup>+</sup> *Pcdh9-Cre* RGCs, 99% were GFP<sup>+</sup>. **(F)** Single-cell transcriptomes from P12 *Pcdh9-Cre* RGCs were combined with the existing single-cell transcriptomes from Spig1-GFP<sup>+</sup>CTB<sup>+</sup> up-oDSGCs and Spig1-GFP<sup>-</sup>CTB<sup>+</sup> down-oDSGCs between P4 and P12. The tSNE plot shows clustering of *Pcdh9-Cre* RGCs predominantly with *Spig1-GFP* RGCs. Scale bars, 50  $\mu$ m.

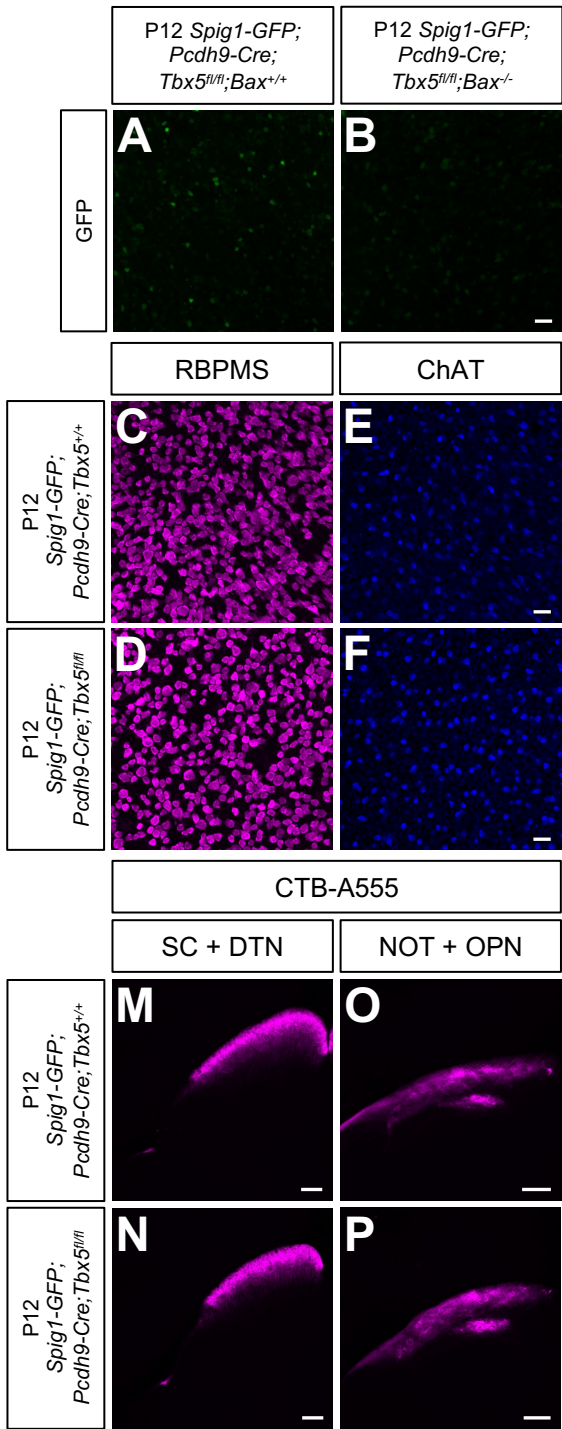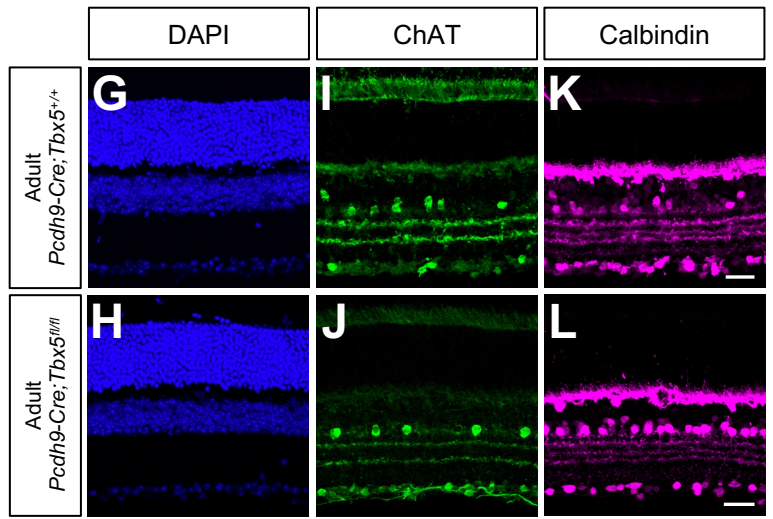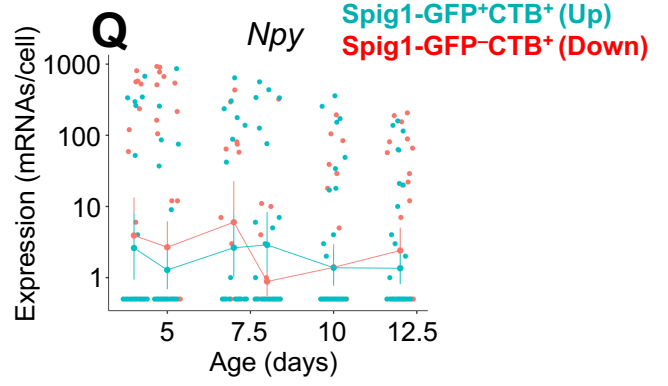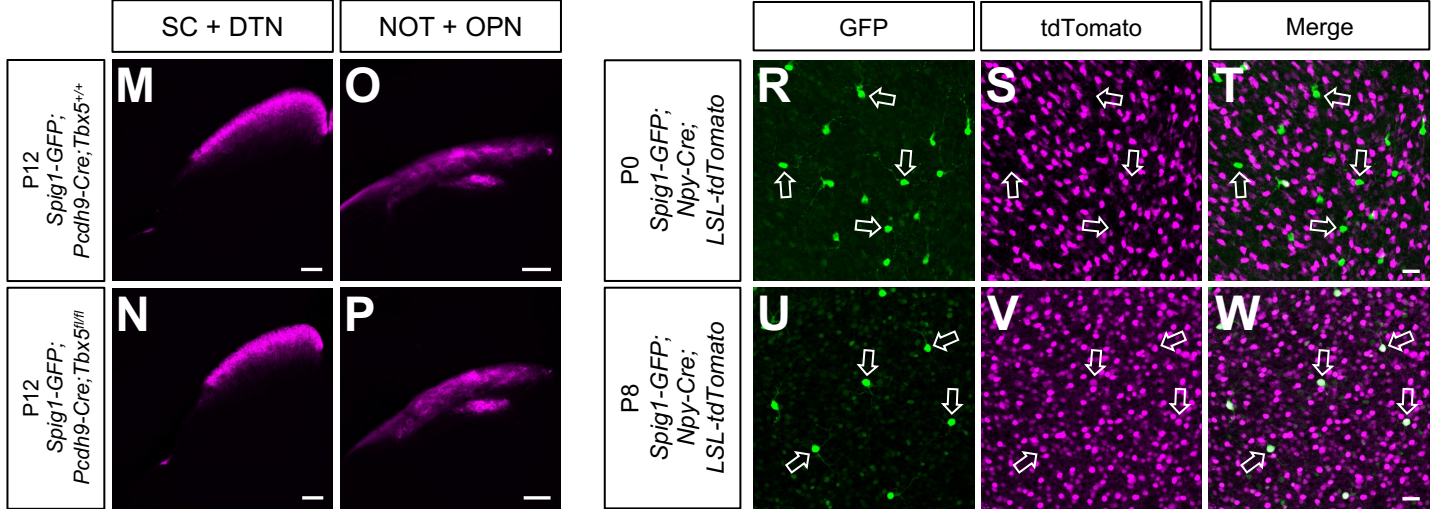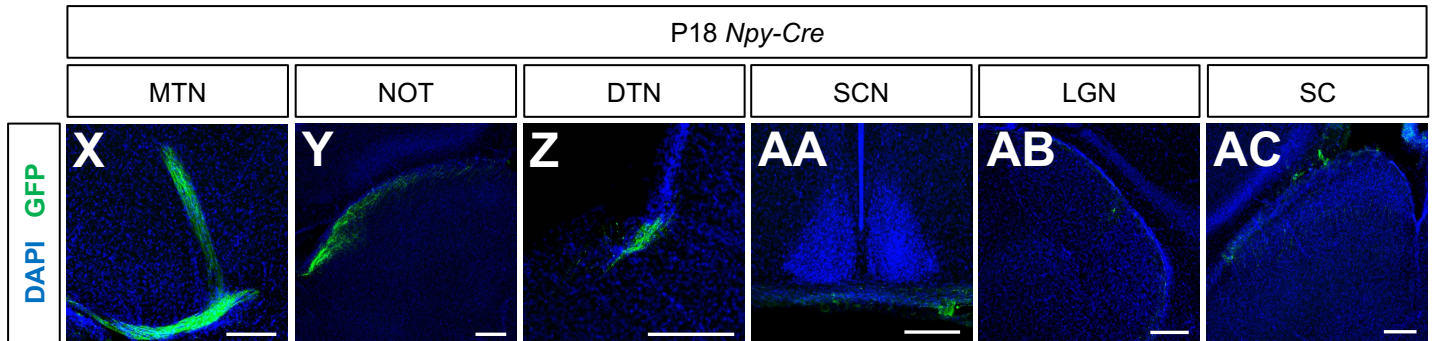

**Figure S3. Additional phenotypic characterization of *Pcdh9-Cre;Tbx5<sup>fl/fl</sup>* mice, related to Figure 3.**

**(A-B)** At P12, Spig1-GFP<sup>+</sup> up-oDSGCs were absent in both *Spig1-GFP;Pcdh9-Cre;Tbx5<sup>fl/fl</sup>;Bax<sup>+/+</sup>* and *Spig1-GFP;Pcdh9-Cre;Tbx5<sup>fl/fl</sup>;Bax<sup>-/-</sup>* retinas **(C-F)** RBPMS<sup>+</sup> RGC density (C-D) and ChAT<sup>+</sup> SAC density (E-F) were normal in P12 *Spig1-GFP;Pcdh9-Cre;Tbx5<sup>fl/fl</sup>* retinas. **(G-L)** Gross retinal architecture, assessed by DAPI (G-H), and inner plexiform layer lamination, assessed by ChAT (I-J) and calbindin (K-L), were normal in adult *Pcdh9-Cre;Tbx5<sup>fl/fl</sup>* retinas. **(M-P)** Innervation of the SC and DTN (M-N), as well as the NOT and OPN (O-P), was preserved in P12 *Spig1-GFP;Pcdh9-Cre;Tbx5<sup>fl/fl</sup>* mice following intraocular injection with CTB-A555. **(Q)** Between P4-P12, both Spig1-GFP<sup>+</sup>CTB<sup>+</sup> up-oDSGCs and Spig1-GFP<sup>-</sup>CTB<sup>+</sup> down-oDSGCs expressed *Npy*, as measured by scRNAseq. Data presented as mean  $\pm$  95% confidence intervals. **(R-W)** GFP<sup>+</sup> up-oDSGCs were tdTomato<sup>-</sup> in *Spig1-GFP;Npy-Cre;LSL-tdTomato* mice at P0 (R-T), but became tdTomato<sup>+</sup> by P8 (U-W). Arrows show example up-oDSGCs. **(X-AC)** P18 *Npy-Cre* mice showed innervation of the MTN, NOT, and DTN (X-Z), but not the SCN, LGN, or SC (AA-AC), following intraocular injection with AAV2 FLEX-GFP at P3. Scale bars, 25  $\mu$ m in (A-L) and (R-W); 250  $\mu$ m in (M-P) and (X-AC).

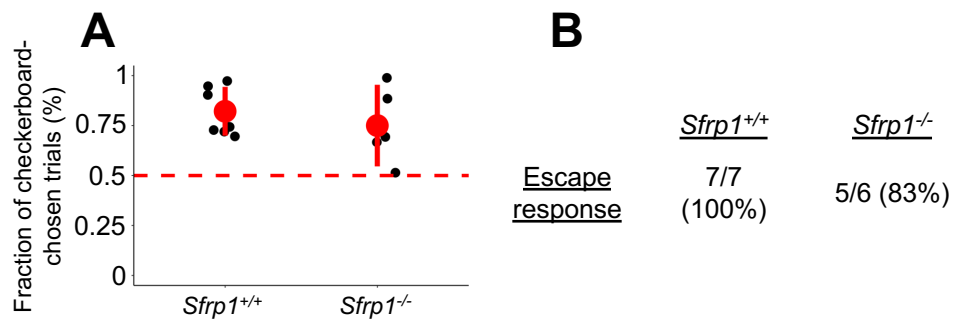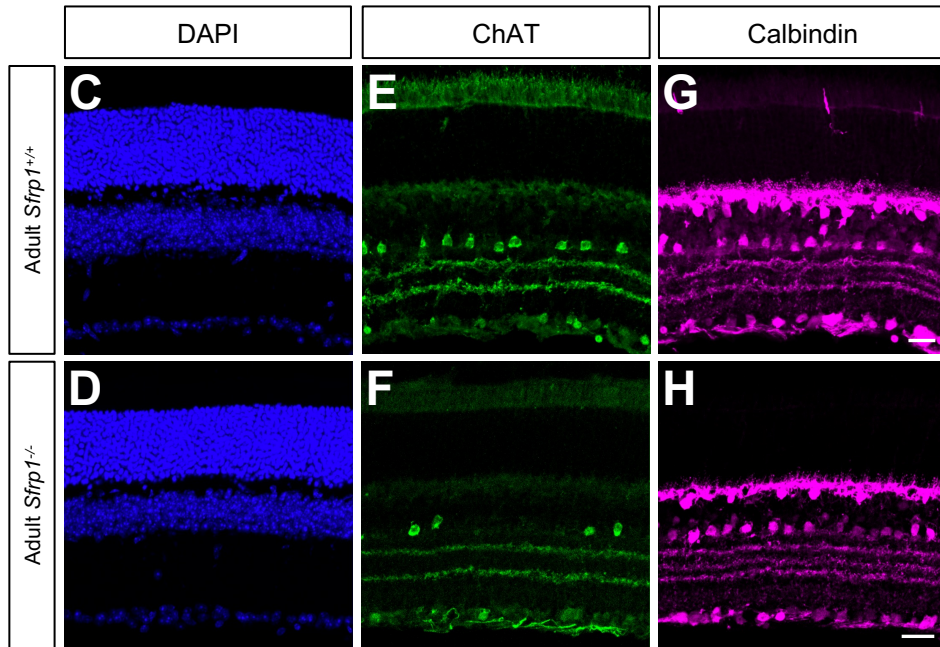

**Figure S4. Additional phenotypic characterization of *Sfrp1*<sup>-/-</sup> mice, related to Figure 4.**

**(A-B)** Adult *Sfrp1*<sup>-/-</sup> mice showed intact depth perception on the visual cliff task (A) and intact escape behaviors on the looming task (B). Data presented as mean  $\pm$  SD. **(C-H)** Gross retinal architecture, assessed by DAPI (C-D), and inner plexiform layer lamination, assessed by ChAT (E-F) and calbindin (G-H), were normal in adult *Sfrp1*<sup>-/-</sup> retinas. Scale bars, 25  $\mu$ m.
